# Supplementary material for: Near IR responsive targeted integrated lipid polymer nanoconstruct for enhanced magnolol cytotoxicity in breast cancer
Source: PubMed Central journal article supplement (PMC7260181; doi:10.1038/s41598-020-65521-z), 2020-05-29
Supplement: 41598_2020_65521_MOESM1_ESM.pdf [file 41598_2020_65521_MOESM1_ESM.pdf]

## **Supplementary Information**

### **Near IR responsive integrated targeted lipid polymer nanoconstruct for enhanced magnolol cytotoxicity in breast cancer**

Mona Elhabak<sup>1</sup>, Rihab Osman<sup>2\*</sup>, Mona Mohamed<sup>3</sup>, Ola El-Borady<sup>4</sup>, Gehanne AS Awad<sup>2</sup>, Nahed  
Mortada<sup>2</sup>

<sup>1</sup>Department of Pharmaceutics and Industrial Pharmacy, Faculty of Pharmacy, Al-ahram  
Canadian University, Egypt.

<sup>2</sup>Department of Pharmaceutics and Industrial Pharmacy, Faculty of Pharmacy, Ain Shams  
University, P.O. Box 11566, Abbassia, Cairo, Egypt.

<sup>3</sup> National Institute of Laser Enhanced Science, Cairo University, Cairo, Egypt

<sup>4</sup> Institute of Nanoscience and Nanotechnology, Kafrelsheikh University, Kafrelsheikh, Egypt

| Element | Weight (%) | Atomic (%) |
|---------|------------|------------|
| O K     | 63.66      | 95.57      |
| Au M    | 36.34      | 4.43       |
| Totals  | 100        |            |

**Table S1**

Percent of O and Au in Mag-GNPs/PLGA NPs determined by EDX. *O*: oxygen, *Au*: gold, *K*: *K* level of the X-ray emission lines for oxygen, *M*: *M* level of the X-ray emission lines for gold.

| Incubation time (h) | PS (nm)    |
|---------------------|------------|
| 0                   | 136.1±1.27 |
| 1                   | 141.4±5.83 |
| 2                   | 137.1±2.62 |
| 4                   | 144.0±6.81 |

**Table S2**

Characteristics of Mag-GNPs/PLGA-TZB NPs (formula P4) after storage in serum (50% FBS for 4 h). Results are mean of 3 determinations (±standard deviation).

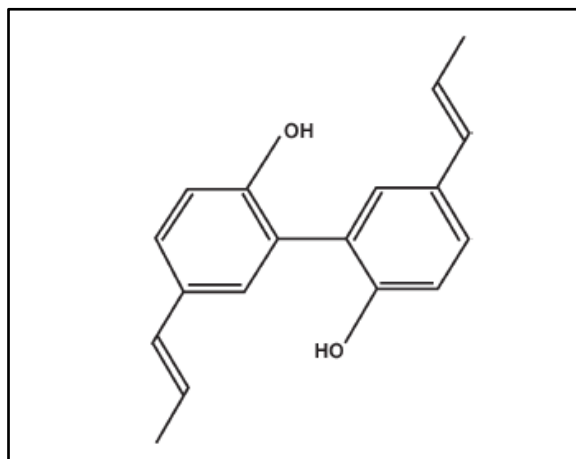

**Figure S1: Chemical structure of magnolol (2-(2-hydroxy-5-prop-2-enylphenyl)-4-prop-2-enylphenol)**

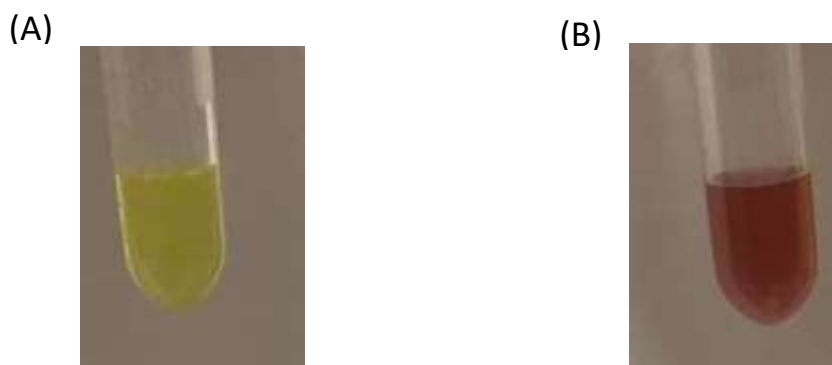

**Figure S2: Photograph of gold dispersion (A) before and (B) after GNPs formation by the Turkevich method. For NPs preparation, HAuCl<sub>4</sub> solution (100mL) was boiled in a conical flask under continuous stirring followed by addition of 1% w/v sodium citrate aqueous solution (10mL). Heating under reflux with stirring continued till formation of a red color.**

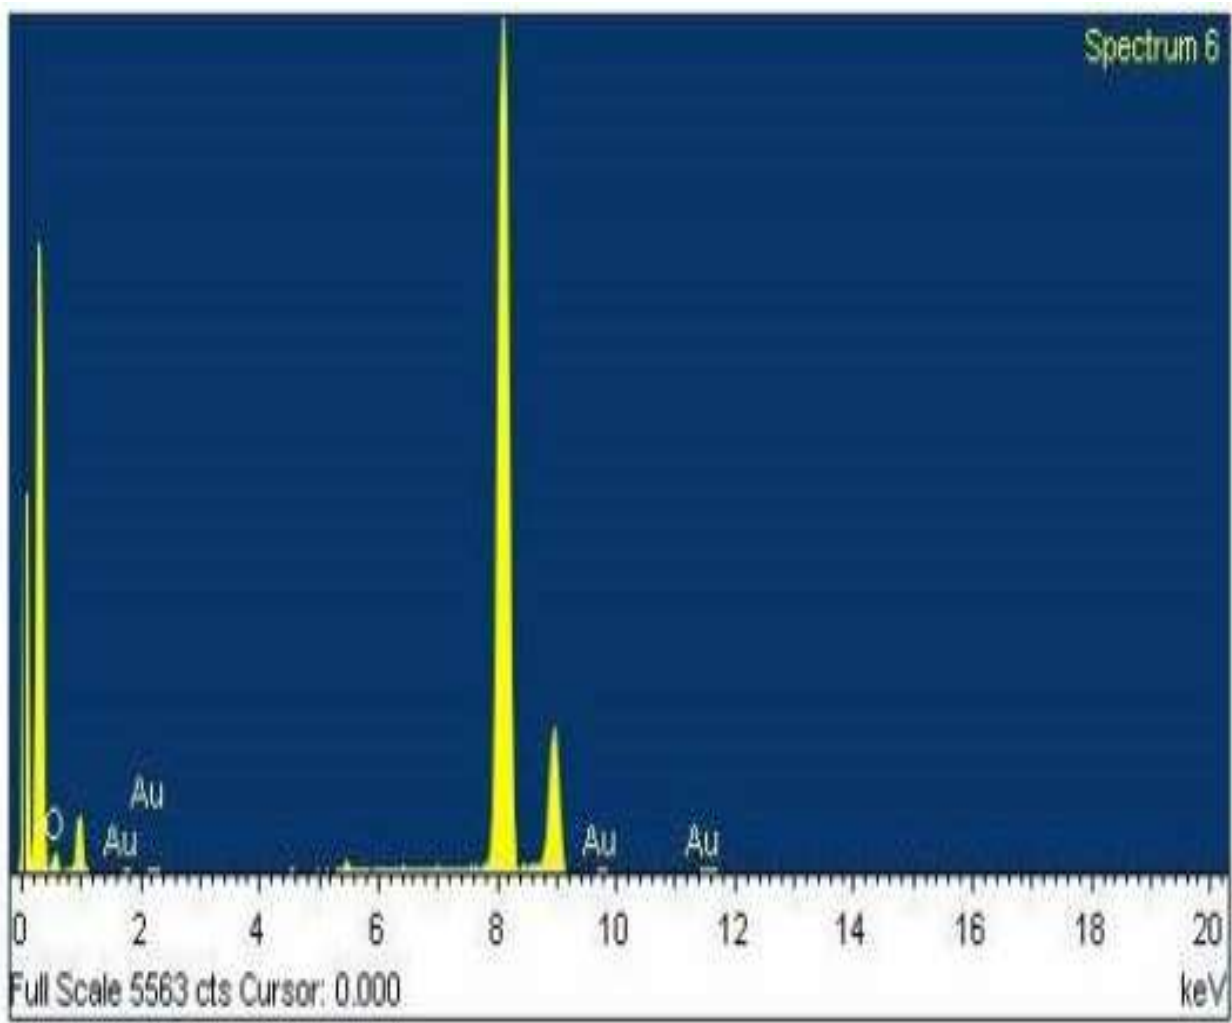

**Figure S3** EDX of Mag-GNPs/PLGA NPs.

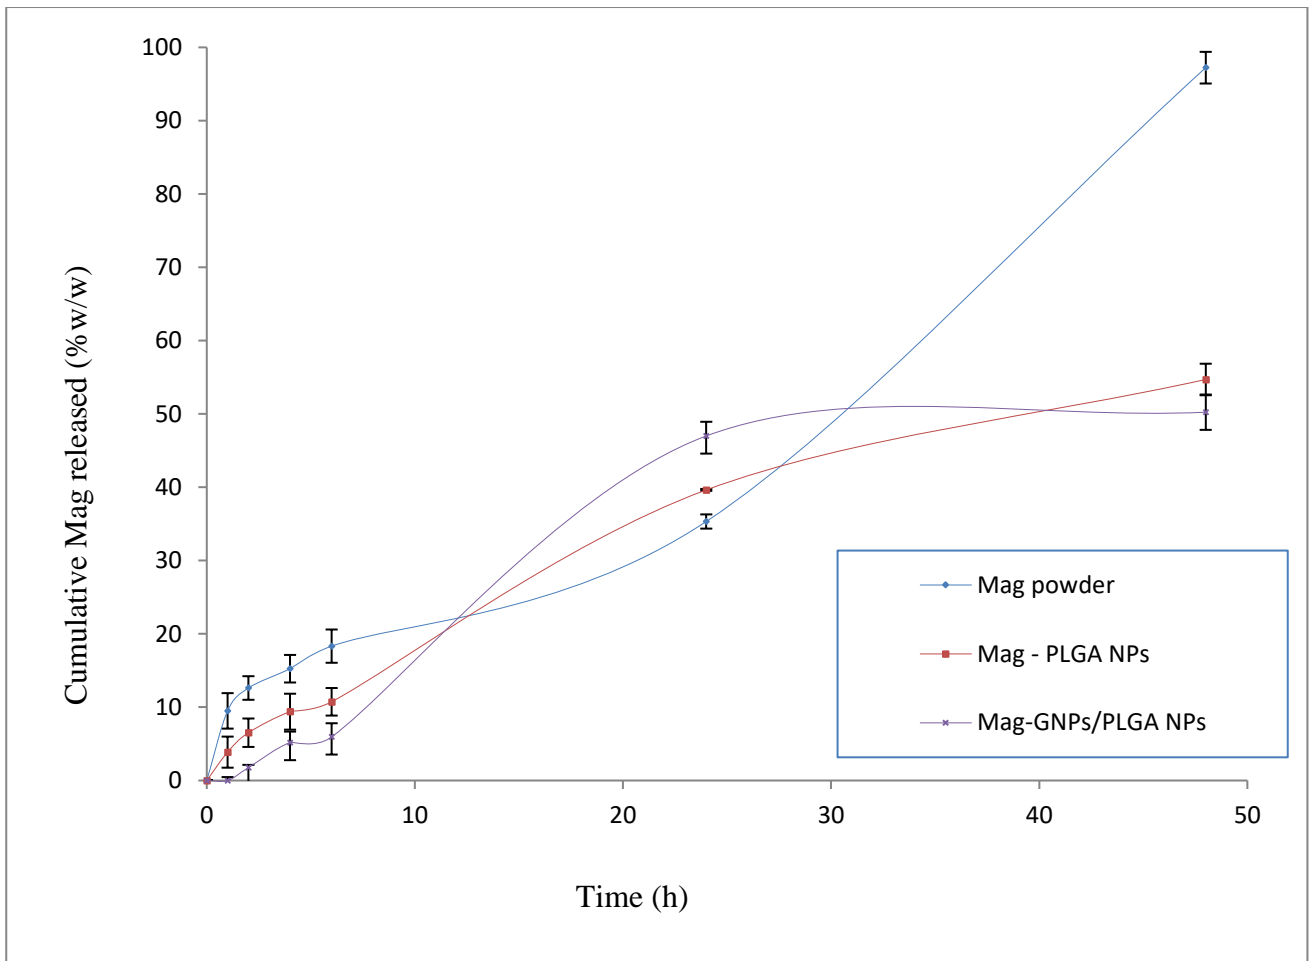

**Figure S4** Release profiles of Mag from various formulations in PBS (pH= 7.4) containing 0.5% w/v SDS at 37°C. Presented data are mean of 3 replicates ( $\pm$ standard deviation).

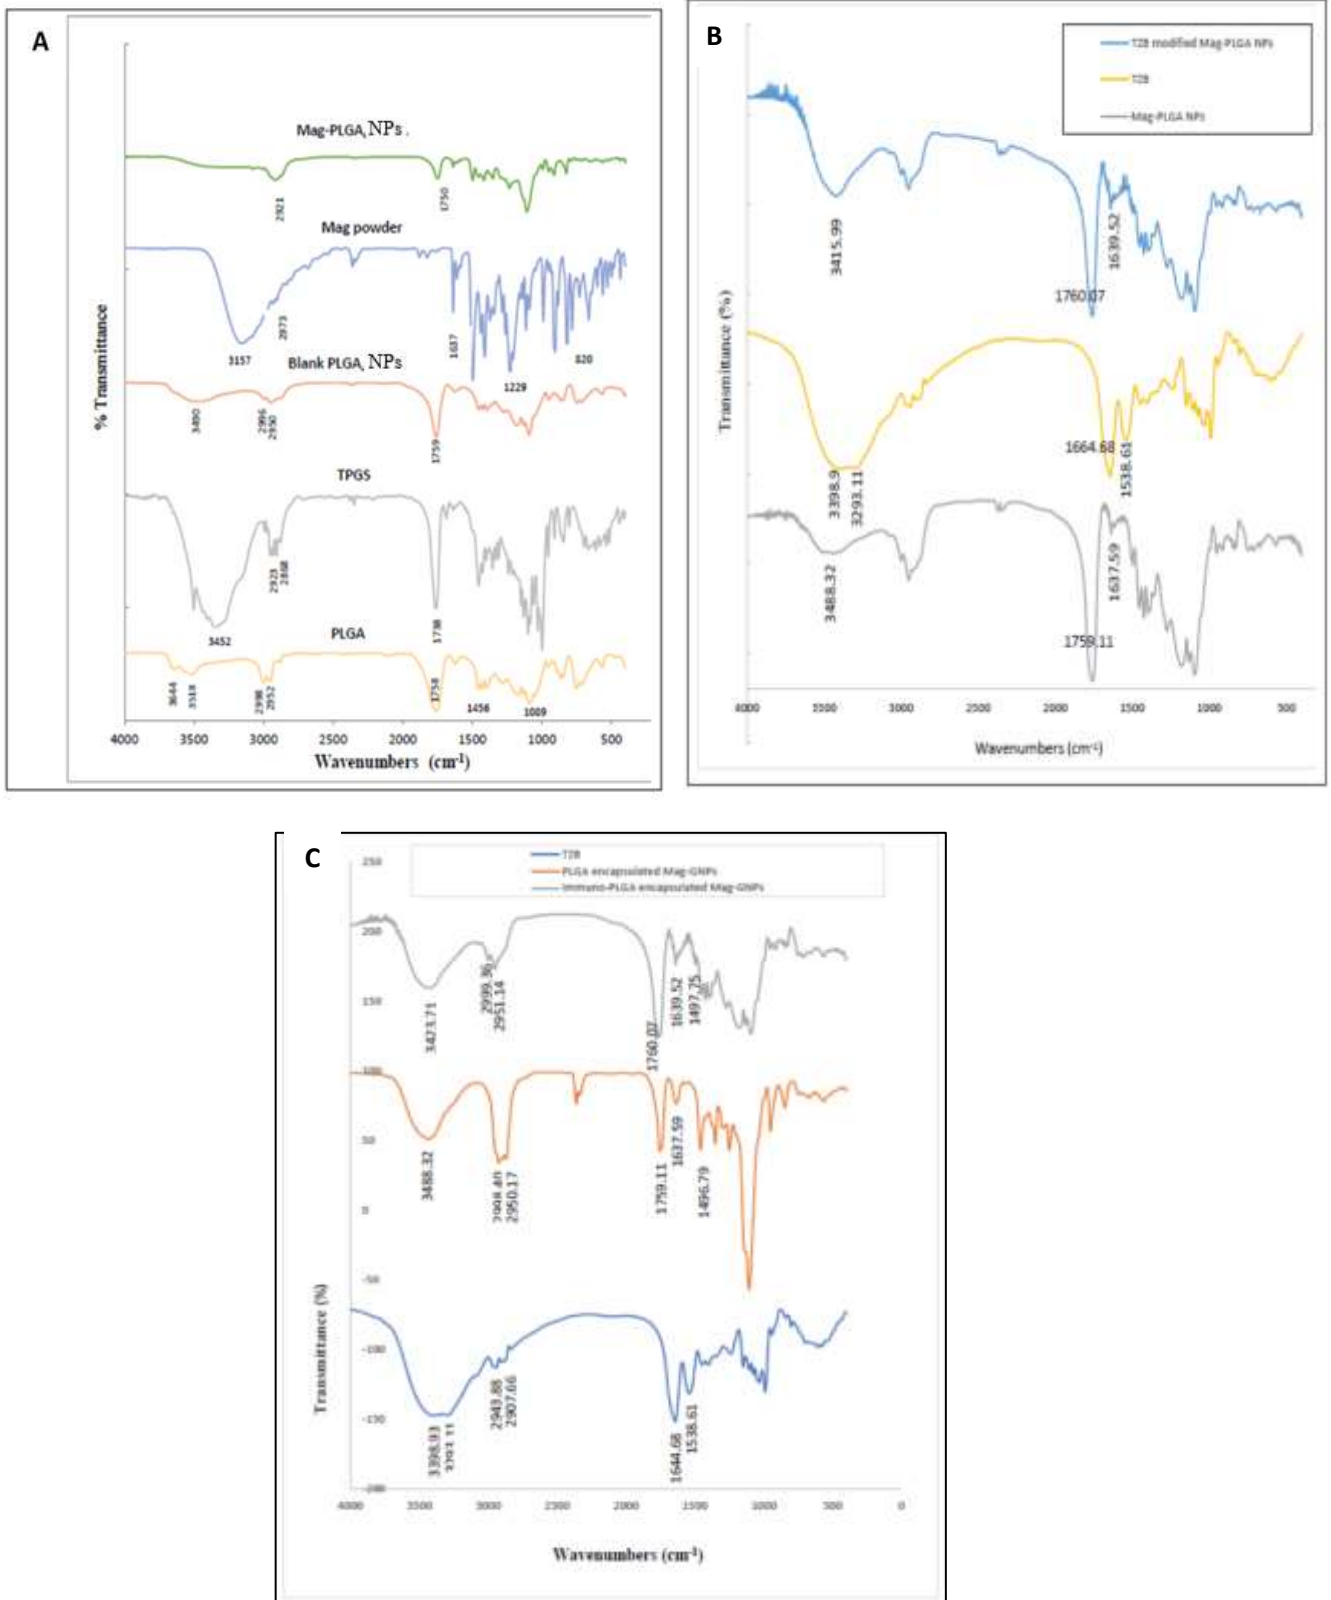

**Figure S5** FTIR spectra of (A) PLGA, Mag, TPGS, Blank PLGA NPs, Mag-PLGA NPs; (B) TZB, Mag-PLGA NPs, TZB modified Mag-PLGA NPs and (C) TZB, PLGA encapsulated Mag-GNPs/PLGA NPs, Mag-GNPs/PLGA-TZB NPs. All PLGA NPs formulae contain TPGS.

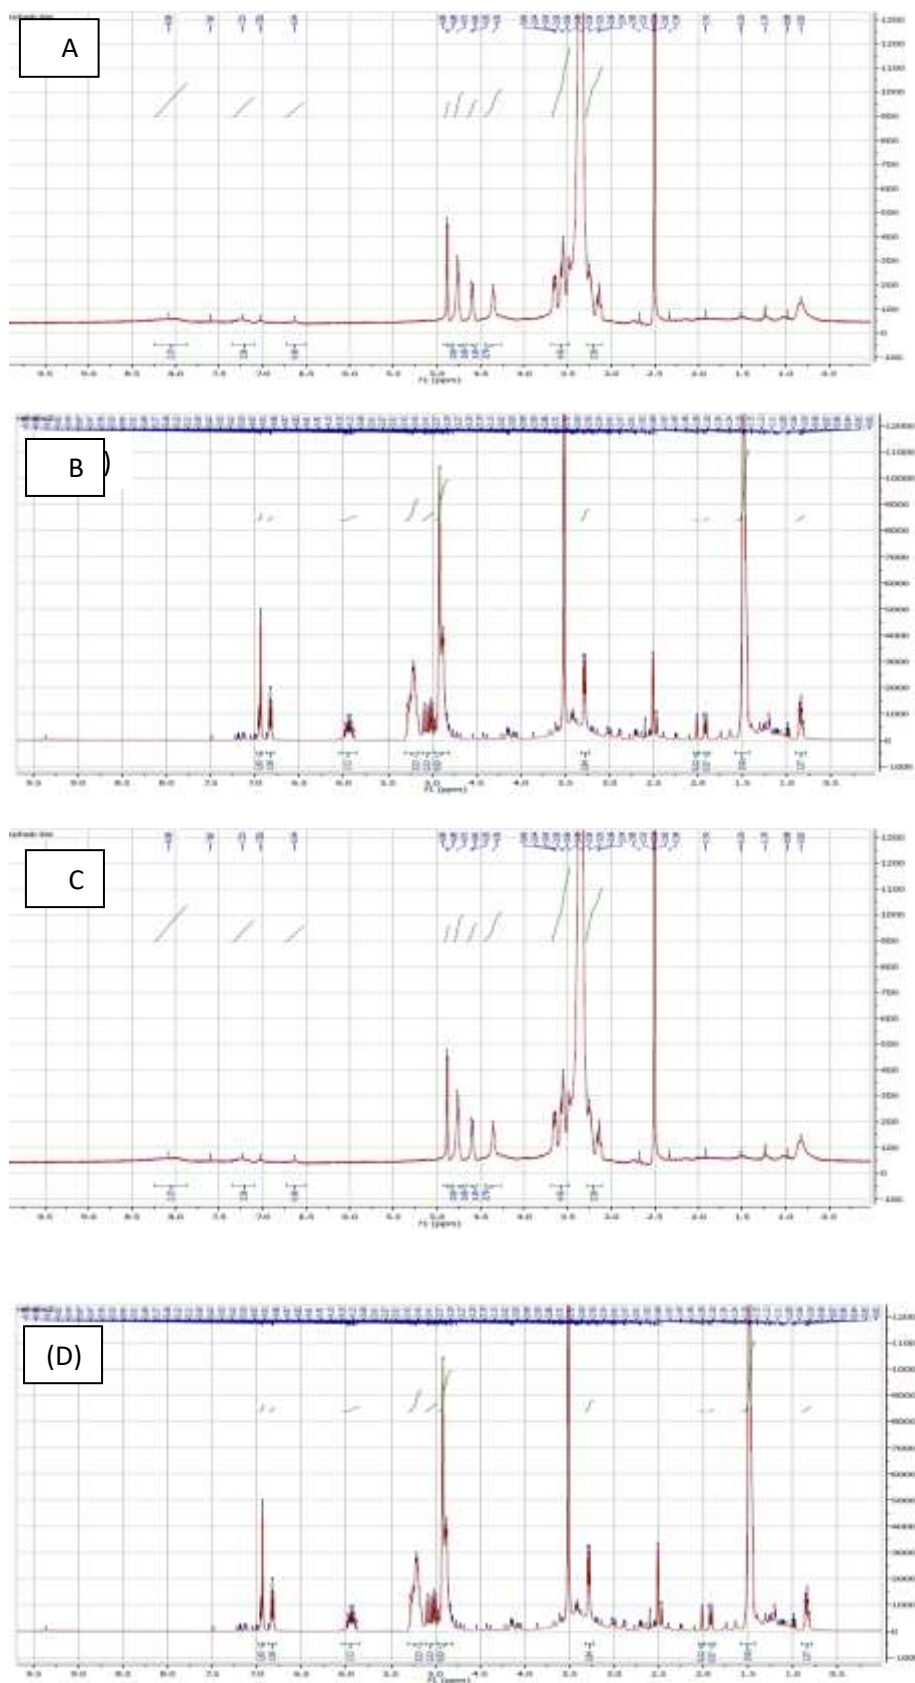

**Figure S6**  $^1\text{H}$ NMR spectra of (A): TPGS, (B) Mag-PLGA NPs, (C) TZB and (D) Mag-PLGA-TZB NPs.

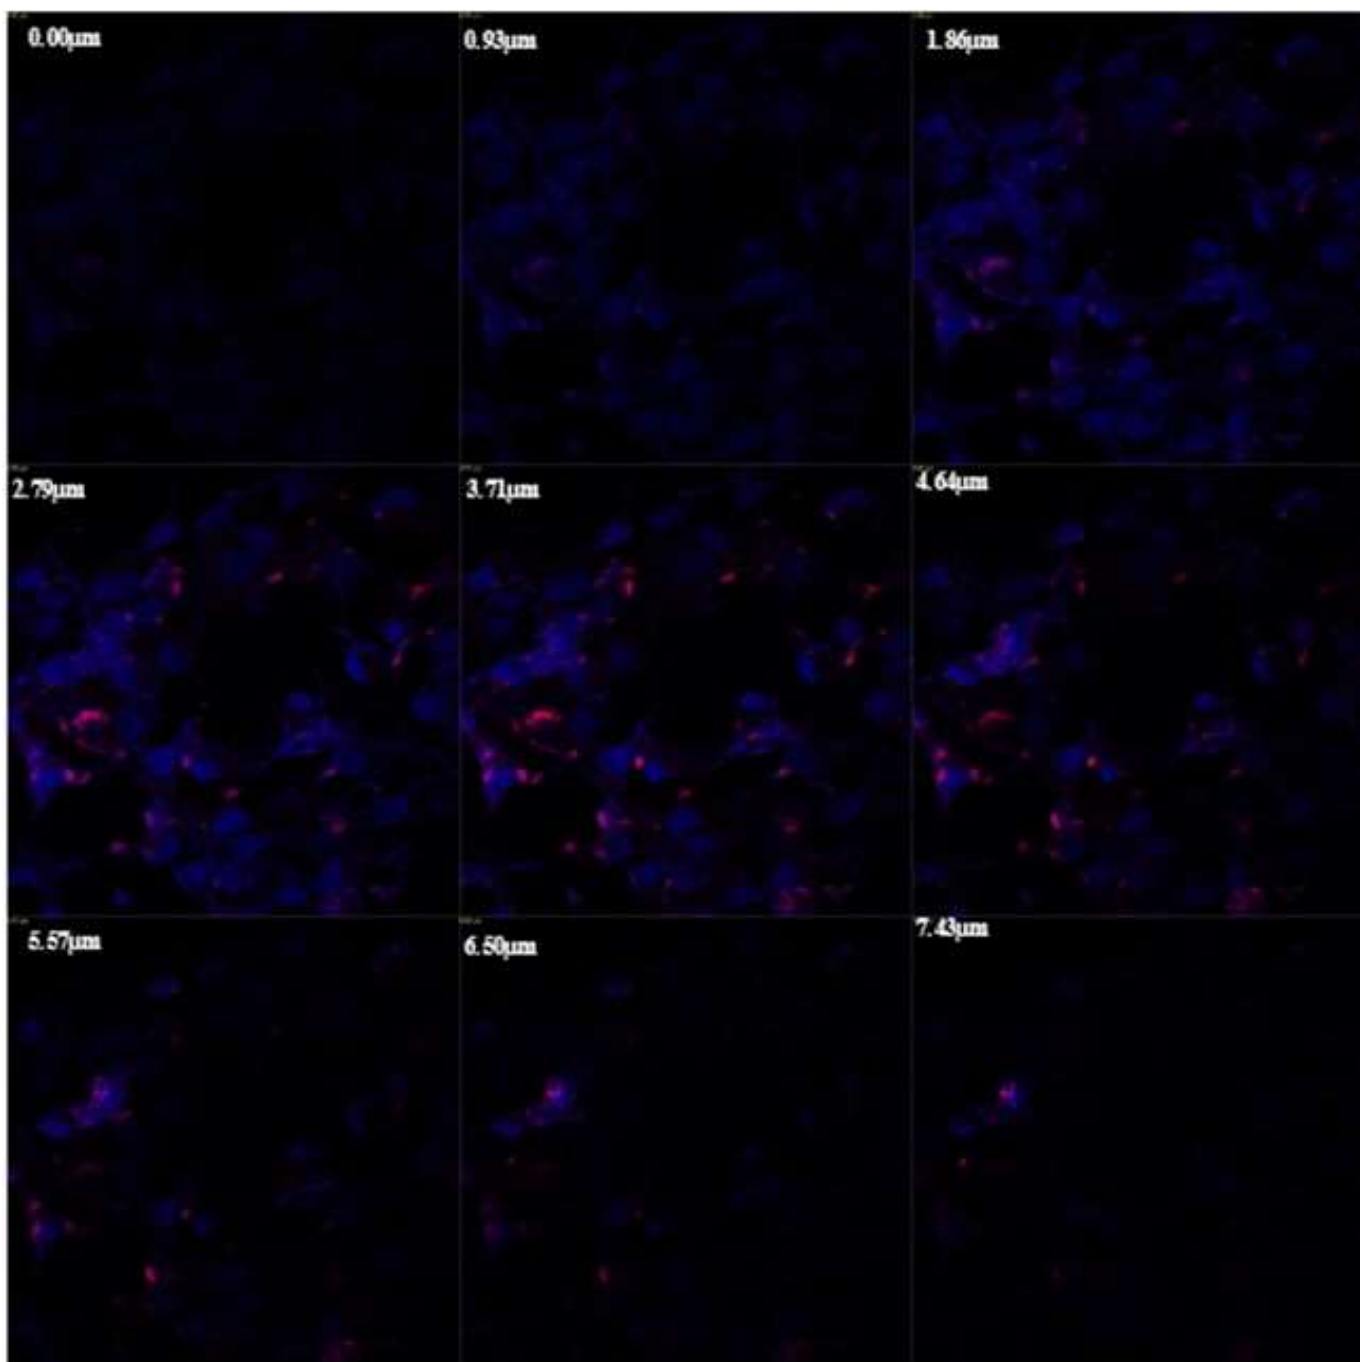

**Figure S7** Z-staked CLSM images of MCF-7 cells treated with Nile red-GNPs/PLGANPs. The nuclei were stained with DAPI and the NPs were labeled with Nile red.



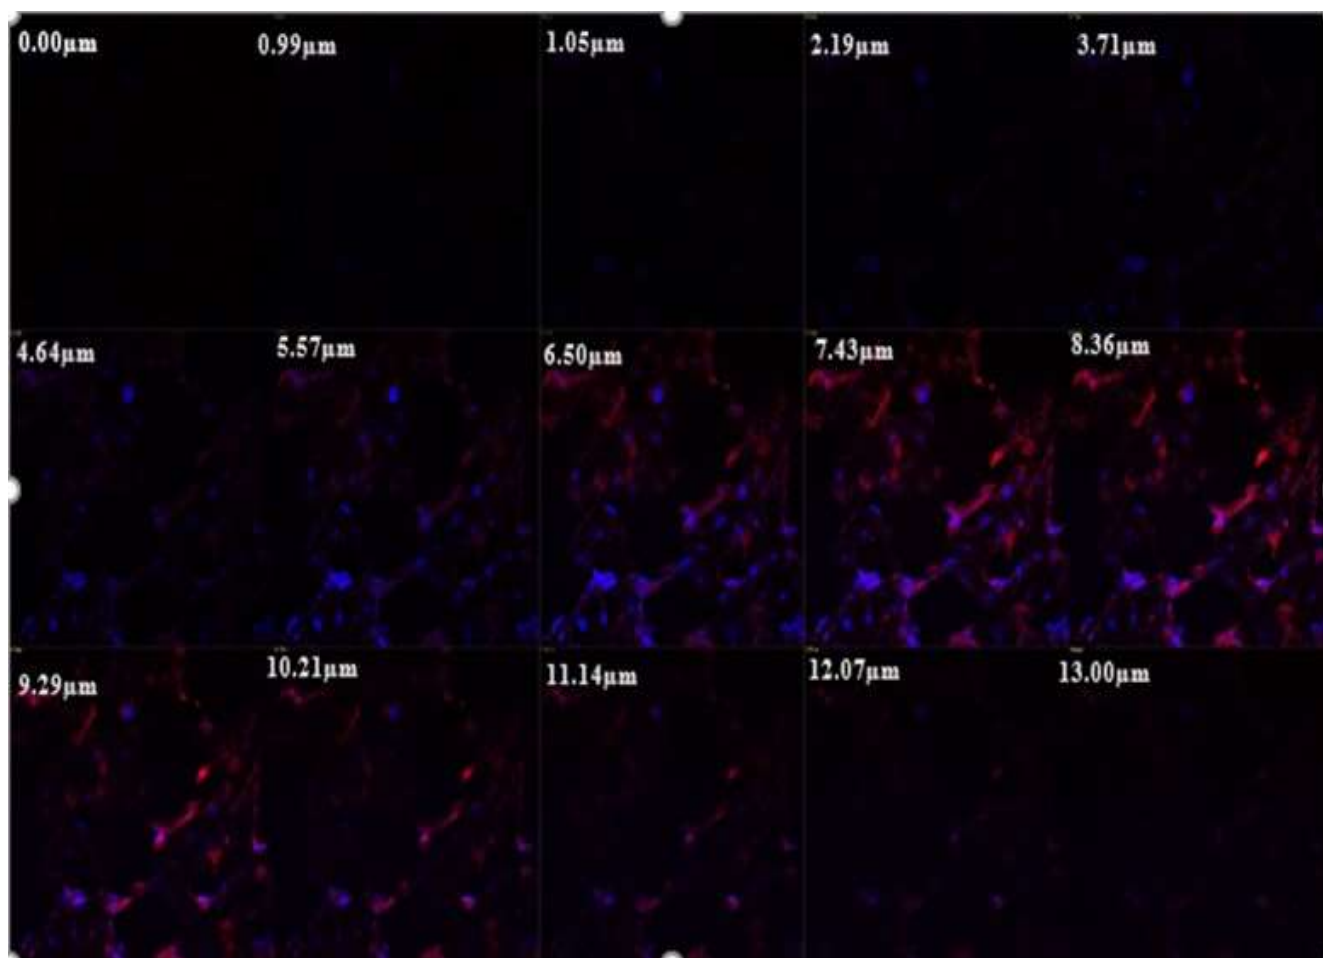

**Figure S8** Z-staked CLSM images of MCF-7 cells treated with TZB modified Nile red/GNPs-PLGA NPs for 60min. The nuclei were stained with DAPI and the NPs were labeled with Nile red.
